# Supplementary material for: Cerebral Resistive Indices and Intraventricular Hemorrhage in Premature Neonates &lt;29 weeks’ gestation: A Pilot Prospective Cohort Study
Source: Research Square preprint supplement (doi:10.21203/rs.3.rs-6422565/v1), 2025-05-22
Supplement: Supplementary file 1 [file af1e0108e212807a9c7c381b.xlsx]

## Sheet: Sheet1
ID#	GA	GestationalAgeInDecimals	Birth Weight (g)	BW(<750=0, >750,1)	Sex 0=m;1=f	APGAR-1	APGAR-5	APGAR-10	Delayed cord clamping 0=n;1=y	IUGR (0=n; 1=y)	Maternal Age	Maternal Chorio (o=n; 1=yes)	Maternal PIH/ Pre-eclampsia (0=n; 1=y)	PPROM >24h (0=n; 1=y)	Antenatal Steroids (BMZ x2 doses > 24 hours prior to delivery) (0=n; 1=y)	Mag sulfate (0=n; 1=y)	Drugs used during pregnancy	placental pathology	Scan date/time	Age1(hrs)	BP Systolic 1	BP Diastolic 1	Mean BP 1	Pulse pressure (pp 1)	RIGHT End Systolic Velocity (RS1)	RIGHT End Diastolic Velocity (RD1)	RIGHT Resistive Index (RR1)	Left End Systolic Velocity (LS1)	Left End Diastolic Velocity (LD1)	Left Resistive Index (LR1)	Average RI (R1)	AVERGAGE S1	avergage d1	S/D 1	Date/time 2nd Dopper	Age2 (hrs)	Age2 (days)	BP Systolic 2	BP Diastolic 2	Mean BP 2	Pulse pressure (pp2)	Right End Sytolic Velocity (RS2)	Right End Diastolic Velocity (RD2)	Right RRI-2	Left End Sytolic Velocity (LS2)	Left End Diastolic Velocity (LD2)	Left LRI-2	Average RI-2 (RI2)	AVERAGE S2
1	24+1	24.1429	460	0	1	3	8		0	1	24	?	0	0	1	0	heroin, methamphetamine,		2017-09-14 11:37:00	#REF!	38	24	30	14	10.5	4.8	0.542857	10.5	4.8	0.542857	0.542857	10.5	4.8	2.1875	2017-09-18 05:50:00	#REF!	#REF!	35	22	25	13	9.43	3.02	0.679745	9.43	3.02	0.679745	0.679745	9.43
2	27+5	27.7143	800	1	1	4	9		0	0	33	0	1	0	1	1	NONE		2017-09-21 13:00:00	#REF!	68	56	60	12	13.34	4.45	0.666417	13.34	4.45	0.666417	0.666417	13.34	4.45	2.99775	2017-09-25 14:00:00	#REF!	#REF!	70	54	59	16	16.5	3.7	0.775758	16.5	3.7	0.775758	0.775758	16.5
3	26+6	26.8571	995	1	1	7	9		0	0	26	0	0	1	0	0	NONE		2017-09-21 15:51:00	#REF!	55	37	43	18	8.4	3.1	0.630952	13.2	4.7	0.643939	0.637446	10.8	3.9	2.76923	2017-09-26 08:50:00	#REF!	#REF!	55	29	38	26	9.79	2.31	0.764045	10.85	3.38	0.688479	0.726262	10.32
4	26+3	26.4286	901	1	0	4	9		1	0	35	0	0	1	1	1	nicotine		2017-09-28 09:24:00	#REF!	58	37	44	21	9.07	2.67	0.705623	7.65	3.38	0.55817	0.631896	8.36	3.025	2.76364	2017-10-04 08:00:00	#REF!	#REF!	64	42	31	22	12.28	3.74	0.69544	14.61	4.58	0.686516	0.690978	13.445
5	26+3	26.4286	876	1	0	7	9		1	0	35	0	0	1	1	1	nicotine		2017-09-27 13:44:00	#REF!	43	27	33	16	6.23	3.02	0.515249	6.1	3.05	0.5	0.507624	6.165	3.035	2.0313	2017-10-02 16:00:00	#REF!	#REF!	52	24	30	28	18.68	5.51	0.705032	13.7	3.74	0.727007	0.71602	16.19
6	27+1	27.1429	1135	1	1	5	6	8	1	0	32	1	0	1	1	1	NONE		2017-10-05 15:00:00	#REF!	45	19	29	26	8	2.7	0.6625	10.5	3.38	0.678095	0.670298	9.25	3.04	3.04276	2017-10-11 14:30:00	#REF!	#REF!	59	31	40	28	9.79	3.02	0.691522	10.85	3.38	0.688479	0.690001	10.32
7	27+6	27.8571	1070	1	1	4	7		1	0	35	0	0	1	1	1	NONE		2017-10-06 22:49:00	#REF!	48	28	31	20	8.72	2.67	0.693807	8.01	2.67	0.666667	0.680237	8.365	2.67	3.13296	2017-10-11 14:10:00	#REF!	#REF!	52	28	35	24	13.34	4.09	0.693403	12.6	4.09	0.675397	0.6844	12.97
8	28+3	28.4286	1000	1	0	7	8		1	0	34	0	0	1	1	1	OPIOD, NICOTINE		2017-10-11 15:13:00	#REF!	63	42	51	21	9.43	3.38	0.641569	11.21	3.38	0.698483	0.670026	10.32	3.38	3.05325	2017-10-15 22:27:00	#REF!	#REF!	70	53	57	17	11.57	4.09	0.6465	14.77	5.5	0.627624	0.637062	13.17
9	27+6	27.8571	1010	1	0	7	9		1	0	28	0	1	0	1	1	NONE		2017-10-11 13:44:00	#REF!	63	38	46	25	9.79	3.02	0.691522	12.99	4.45	0.657429	0.674475	11.39	3.735	3.04953	2017-10-15 22:00:00	#REF!	#REF!	74	44	53	30	17.6	4.45	0.747159	14.77	4.09	0.723087	0.735123	16.185
10	28+3	28.4286	1440	1	0	8	9		1	0	20	0	0	1	1	1	NONE		2017-10-13 09:30:00	#REF!	50	24	34	26	10.5	3.38	0.678095	13.3	4.45	0.665414	0.671754	11.9	3.915	3.03959	2017-10-18 13:34:00	#REF!	#REF!	71	42	52	29	13.7	5.16	0.623358	16.19	5.8	0.641754	0.632556	14.945
11	28+3	28.4286	865	1	0	8	9		1	0	20	0	0	1	1	1	NONE		2017-10-13 09:10:00	#REF!	57	30	41	27	9.08	3.38	0.627753	9.08	3.74	0.588106	0.60793	9.08	3.56	2.55056	2017-10-18 14:20:00	#REF!	#REF!	69	35	43	34	22.6	5.52	0.755752	14.56	3.57	0.754808	0.75528	18.58
12	24+3	24.4286	650	0	0	5	5	6	1	0	30	1	0	1	1	1	NONE		2017-12-12 15:17:00	#REF!	39	13	21	26	11.9	3.38	0.715966	14.4	4.09	0.715972	0.715969	13.15	3.735	3.52075	2017-12-18 08:32:00	#REF!	#REF!	73	59	62	14	9.79	3.38	0.65475	10.5	3.38	0.678095	0.666422	10.145
13	23+6	23.8571	760	1	1	5	6	7	1	0	32	1	0	0	1	1	MARIJUANA		2018-01-02 15:32:00	#REF!	49	25	33	24	9.79	3.02	0.691522	11.57	4.45	0.615385	0.653453	10.68	3.735	2.85944	2018-01-08 11:54:00	#REF!	#REF!	50	42	45	8	25.5	6.3	0.752941	22.8	6.3	0.723684	0.738313	24.15
14	25+4	25.5714	720	0	0	4	7		0	0	31	0	0	0	1	1	methadone, THC, zofran, PNVs - after admission: indomethacin, ibuprofen, pepcid, iron PNV, azithromycin ,kefzol, penicillin, Vit C, Vit D		2018-01-09 16:00:00	#REF!	40	21	34	19	8	3.38	0.5775	7.7	3.38	0.561039	0.569269	7.85	3.38	2.32249	2018-01-14 10:00:00	#REF!	#REF!	46	22	31	24	9.79	3.02	0.691522	12.28	4.09	0.666938	0.67923	11.035
15	25+4	25.5714	640	0	1	3	8		0	0	31	0	0	0	1	1	methadone, THC, zofran, PNVs - after admission: indomethacin, ibuprofen, pepcid, iron PNV, azithromycin ,kefzol, penicillin, Vit C, Vit D		2018-01-09 16:00:00	#REF!	34	17	25	17	10.85	3.38	0.688479	14.06	3.38	0.759602	0.72404	12.455	3.38	3.68491	2018-01-14 10:00:00	#REF!	#REF!	78	35	48	43	12.63	3.38	0.732383	17.26	3.74	0.783314	0.757849	14.945
16	26+2	26.2857	870	1	0	3	7		0	0	23	0	0	0	0	1	Albuterol and PNVs		2018-01-18 11:00:00	#REF!	41	21	30	20	9.79	3.02	0.691522	11.57	4.45	0.615385	0.653453	10.68	3.735	2.85944	2018-01-23 15:00:00	#REF!	#REF!	55	23	37	32	14.06	3.38	0.759602	17.6	4.14	0.764773	0.762187	15.83
17	26+2	26.2857	825	1	1	5	9		0	0	23	0	0	0	0	1	Albuterol and PNVs		2018-01-18 11:00:00	#REF!	33	17	24	16	13.34	3.02	0.773613	12.99	4.08	0.685912	0.729763	13.165	3.55	3.70845	2018-01-23 15:00:00	#REF!	#REF!	45	25	34	20	11.21	3.74	0.666369	12.63	4.09	0.676168	0.671269	11.92
18	28+2	28.2857	1000	1	0	8	9		1	0	28	0	1	0	0	1	PNVs, Insulin		2018-01-19 16:00:00	#REF!	44	30	33	14	9.07	3.38	0.627343	10.85	3.74	0.6553	0.641321	9.96	3.56	2.79775	2018-01-25 11:00:00	#REF!	#REF!	80	59	66	21	13.34	3.38	0.746627	15.48	4.09	0.735788	0.741207	14.41
19	27+5	27.7143	1300	1	0	9	9		1	0	28	0	0	0	0	0	pnvS, ALBUTEROL, singulair	NORMAL	2018-01-26 15:16:00	#REF!	43	24	29	19	15.8	4.45	0.718354	15.48	3.74	0.758398	0.738376	15.64	4.095	3.81929	2018-01-31 14:57:00	#REF!	#REF!	59	30	41	29	12.28	4.09	0.666938	14.4	4.45	0.690972	0.678955	13.34
20	27+5	27.7143	1225	1	0	8	9		1	0	28	0	0	0	0	0	pnvS, ALBUTEROL, singulair	MARGINAL INSERTION OF CORD	2018-01-26 15:33:00	#REF!	48	26	33	22	12.63	4.45	0.647664	9.79	3.02	0.691522	0.669593	11.21	3.735	3.00134	2018-01-31 14:39:00	#REF!	#REF!	52	27	36	25	9.79	3.02	0.691522	9.79	3.38	0.65475	0.673136	9.79
21	24	24	830	1	0	x	x		0	0	30	0	0	0	0	0	none	ACUTE ABRUPTION	2018-02-15 06:00:00	#REF!	41	18	27	23	10.14	3.38	0.666667	11.92	4	0.66443	0.665548	11.03	3.69	2.98916	2018-02-20 11:53:00	#REF!	#REF!	76	41	52	35	12.63	3.38	0.732383	15.12	4.45	0.705688	0.719036	13.875
22	27+1	27.1429	980	1	1	5	9		1	0	25	1	0	0	0	1	none	Chronic uteroplacental insufficiency	2018-02-26 22:31:00	#REF!	32	21	26	11	10.85	3.38	0.688479	14.06	4.09	0.709104	0.698792	12.455	3.735	3.33467	2018-03-01 23:15:00	#REF!	#REF!	62	42	49	20	18.68	5.52	0.704497	22.9	6.32	0.724017	0.714257	20.79
23	26+1	26.1429	620	0	1	6	7		0	0	27	0	1	0	0	1	NONE	PRE-ECLAMPSIA	2018-03-20 22:47:00	#REF!	40	26	32	14	9.07	3.38	0.627343	9.43	3.38	0.641569	0.634456	9.25	3.38	2.73669	2018-03-27 10:32:00	#REF!	#REF!	54	38	43	16	9.79	3.38	0.65475	12.28	4.45	0.637622	0.646186	11.035
24	24+5	24.7143	888	1	0	7	8		0	0	27	1	0	1	0	1	NONE	X	2018-03-23 05:49:00	#REF!	44	22	30	22	10.2	3.38	0.668627	10.5	3.38	0.678095	0.673361	10.35	3.38	3.06213	2018-03-27 10:16:00	#REF!	#REF!	52	31	37	21	22.46	6.32	0.718611	20.28	5.45	0.731262	0.724937	21.37
25	26+5	26.7143	1125	1	0	2	6	7	0	0	28	0	0	0	1	1	NONE	MILD ACUTE CHORIOAMNIONITIS	2018-04-02 08:00:00	#REF!	38	23	30	15	13.34	4.45	0.666417	9.79	3.02	0.691522	0.678969	11.565	3.735	3.09639	2018-04-06 14:24:00	#REF!	#REF!	55	23	33	32	16.35	4.14	0.746789	15.04	4.14	0.724734	0.735762	15.695
26	24+3	24.4286	500	0	0	1	2	6	0	1	24	0	0	0	1	1	NONE	NORMAL	2018-04-06 12:19:00	#REF!	42	21	31	21	8.72	3.02	0.65367	9.07	3.38	0.627343	0.640506	8.895	3.2	2.77969	2018-04-12 15:48:00	#REF!	#REF!	59	19	36	40	11.57	3.74	0.67675	13.34	4.45	0.666417	0.671584	12.455
27	24+3	24.4286	575	0	0	5	8		0	0	24	0	0	0	1	1	NONE	chorioamnionitis	2018-04-06 12:54:00	#REF!	41	16	27	25	10.14	3.38	0.666667	11.92	3.38	0.716443	0.691555	11.03	3.38	3.26331	2018-04-12 15:17:00	#REF!	#REF!	48	27	37	21	14.4	3.74	0.740278	15.48	4.45	0.712532	0.726405	14.94
28	24+3	24.4286	630	0	0	4	5	7	0	0	24	0	0	0	1	1	NONE	chorioamnionitis	2018-04-06 13:10:00	#REF!	31	16	23	15	10.14	3.02	0.70217	10.85	3.38	0.688479	0.695324	10.495	3.2	3.27969	2018-04-12 15:35:00	#REF!	#REF!	48	24	32	24	14.4	4.8	0.666667	10.85	3.74	0.6553	0.660983	12.625
29	26+2	26.2857	1020	1	1	3	4	6	1	0	31	1	0	0	0	1	NONE	X	2018-04-06 16:00:00	#REF!	32	18	24	14	12.99	4.09	0.685142	12.28	4.09	0.666938	0.67604	12.635	4.09	3.08924	2018-04-11 18:00:00	#REF!	#REF!	44	25	33	19	12.99	3.74	0.712086	14.06	3.74	0.733997	0.723042	13.525
30	28+1	28.1429	1274	1	1	7	8		1	0	25	1	0	0	1	1	marijuana	chorioamnionitis	2018-04-18 08:00:00	#REF!	78	63	68	15	14.4	3.38	0.765278	14.7	3.74	0.745578	0.755428	14.55	3.56	4.08708	2018-04-23 15:20:00	#REF!	#REF!	68	55	60	13	22.8	5.4	0.763158	26.5	5.55	0.790566	0.776862	24.65
[truncated: 30 more columns]
